# Supplementary material for: Recurrent Loss of Specific Introns during Angiosperm Evolution
Source: PubMed Central journal article supplement (PMC4256211; doi:10.1371/journal.pgen.1004843), 2014-12-04

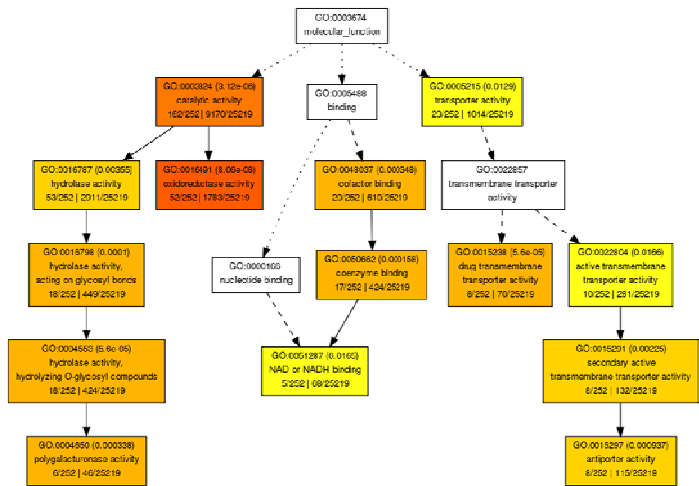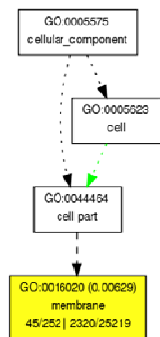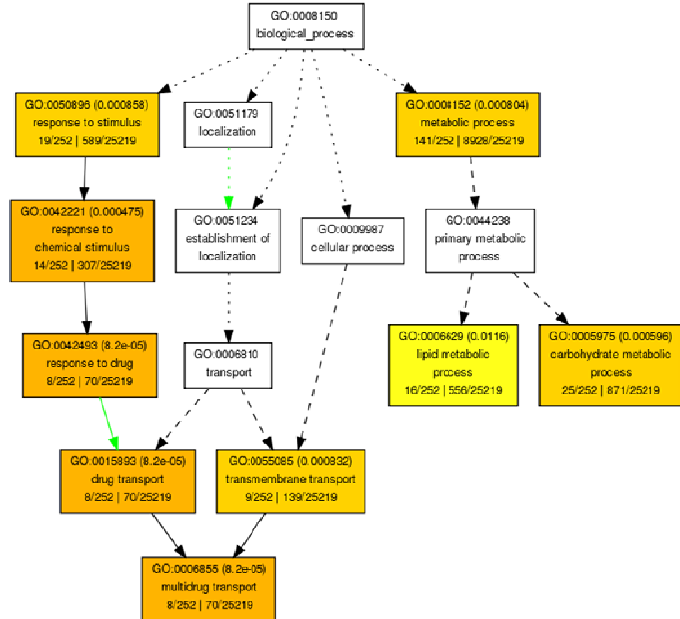

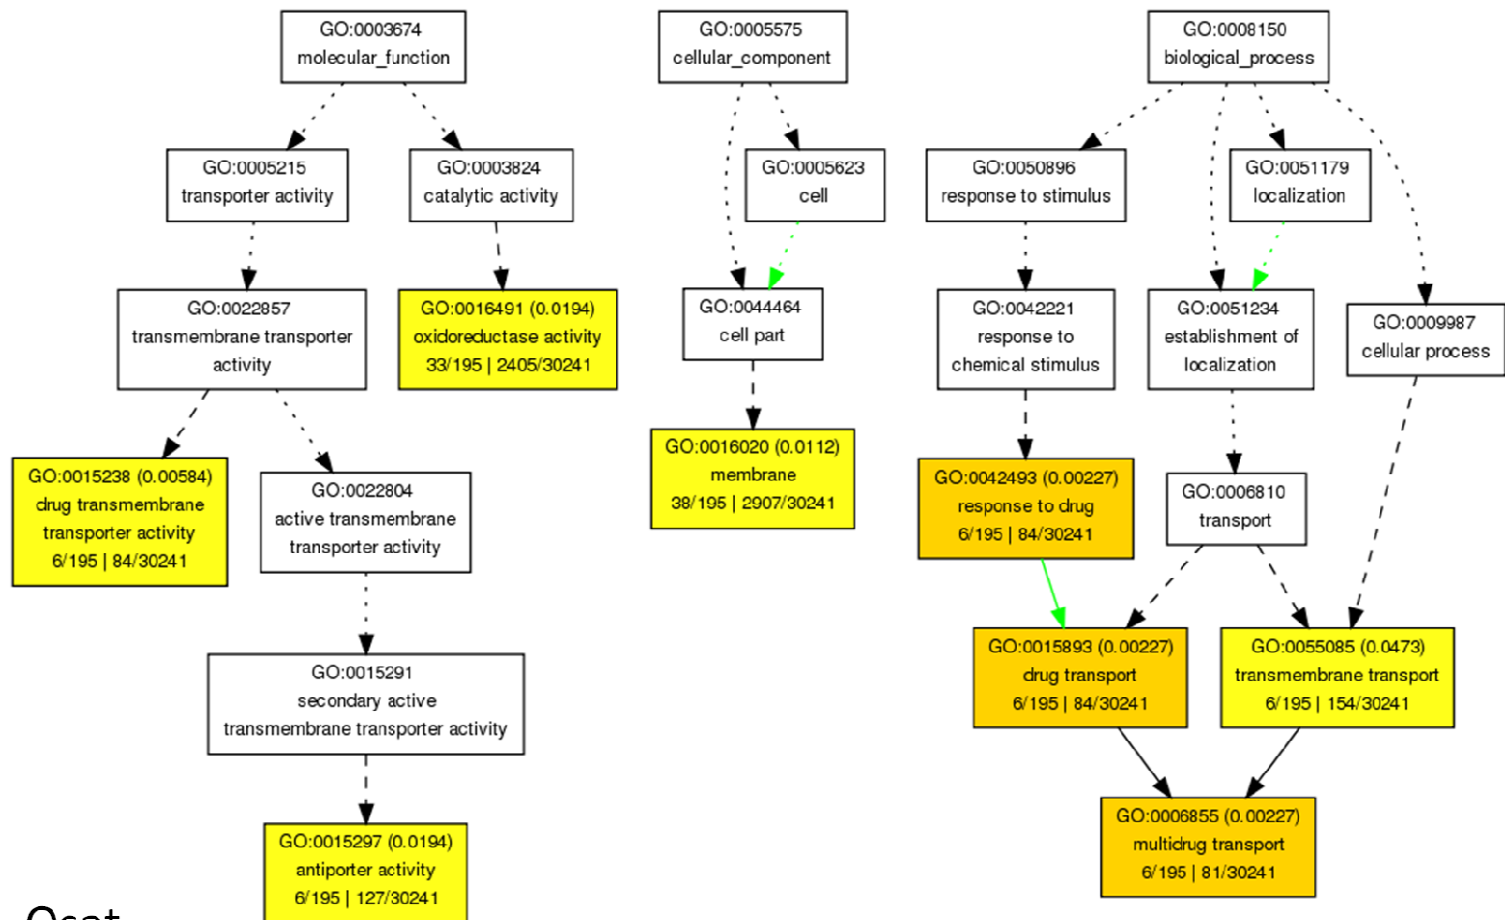

Osat

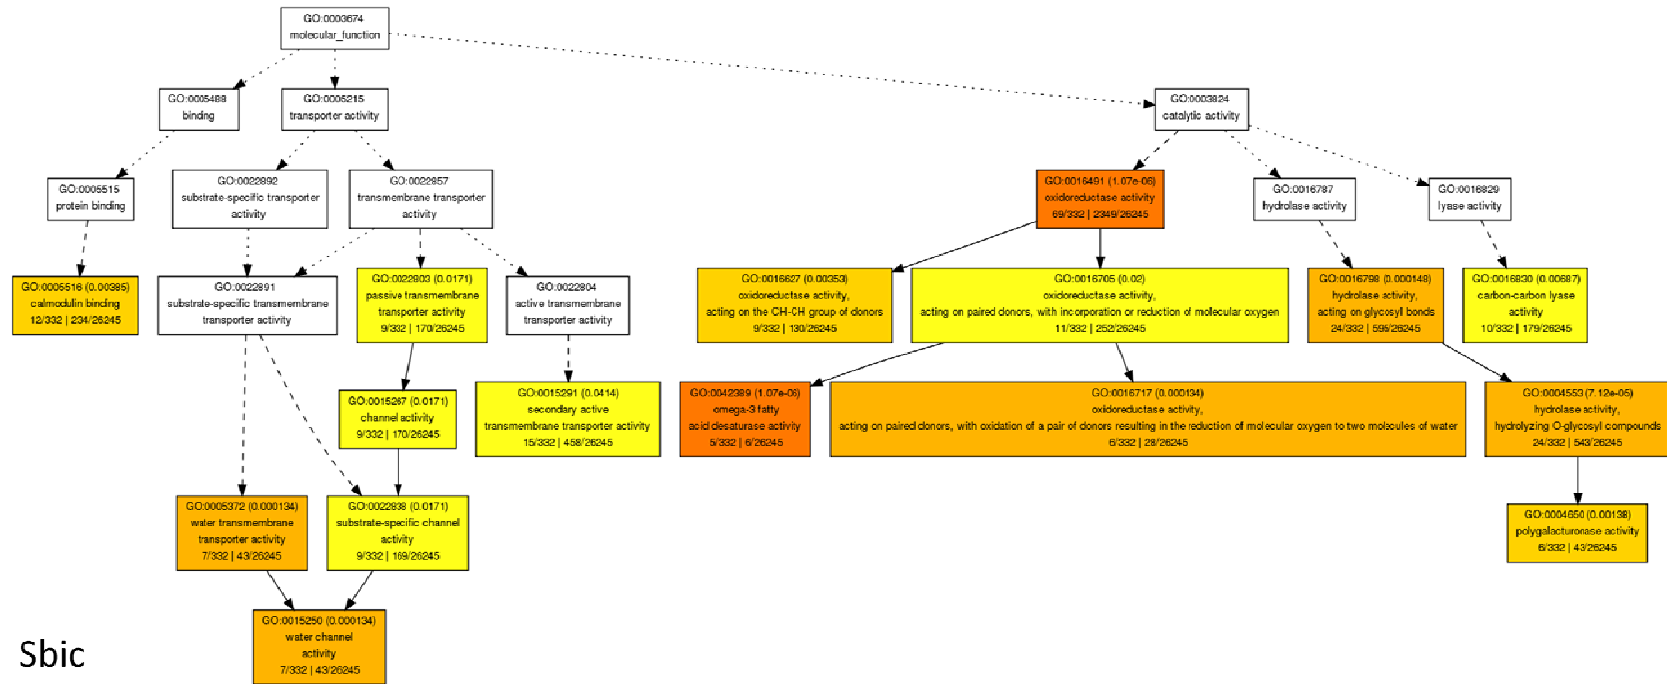

Sbic

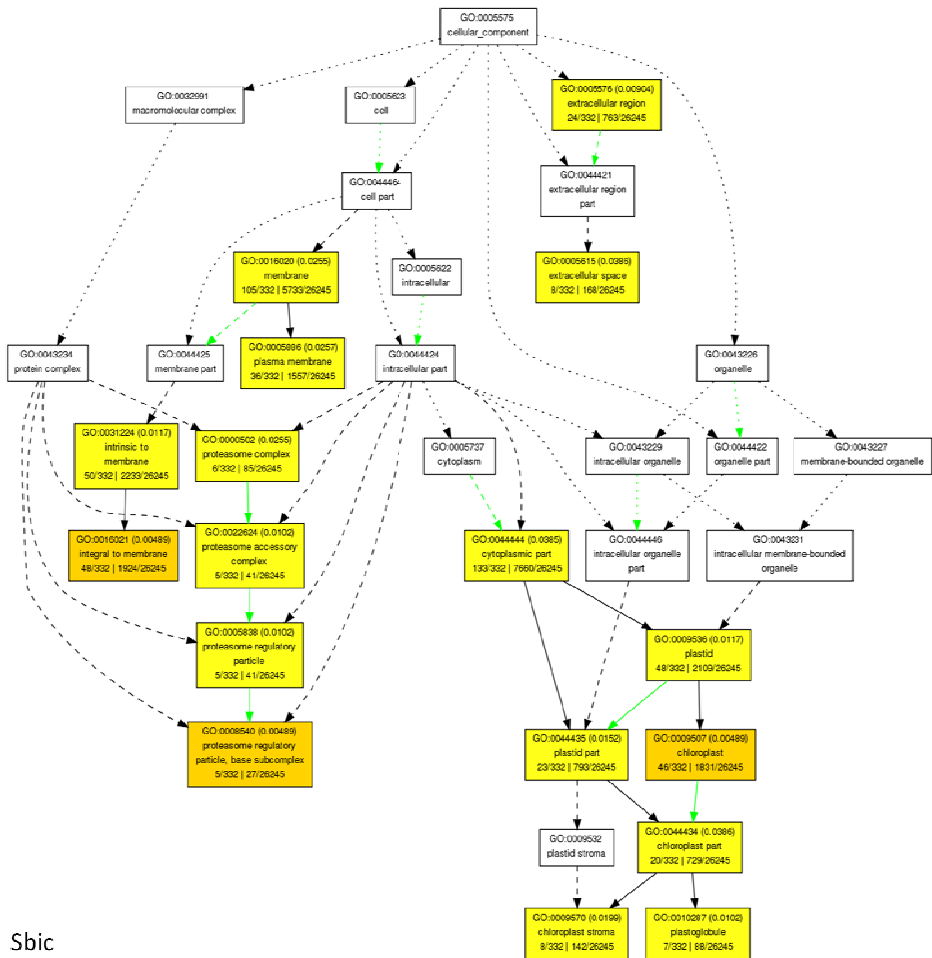

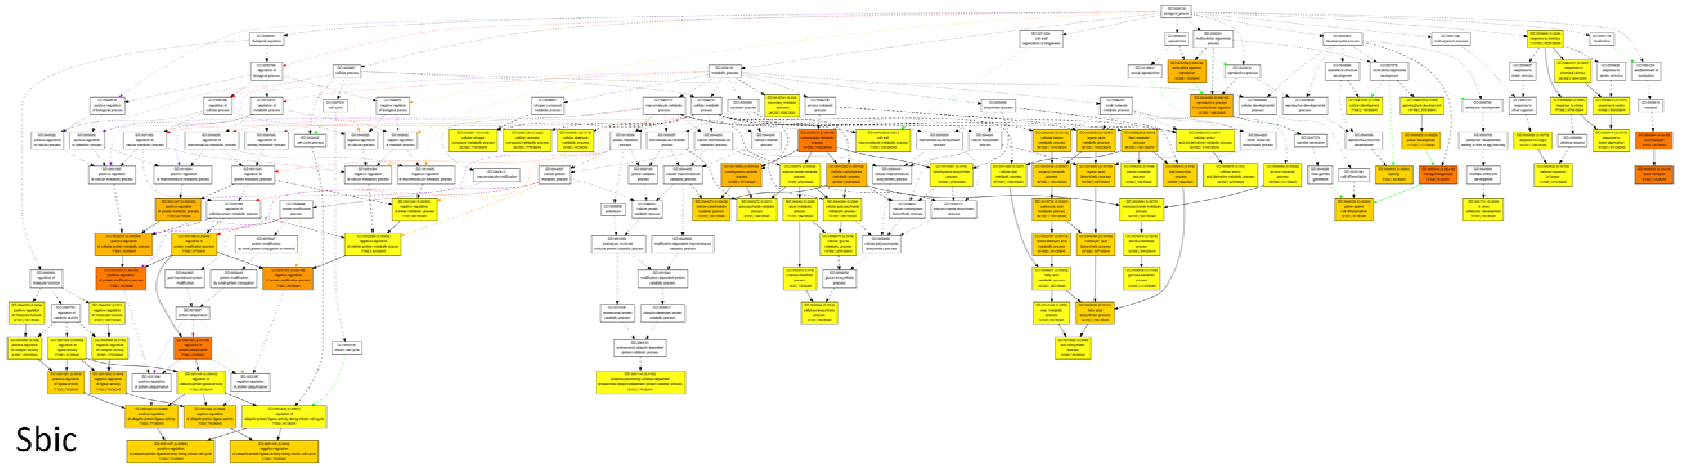

Sbic

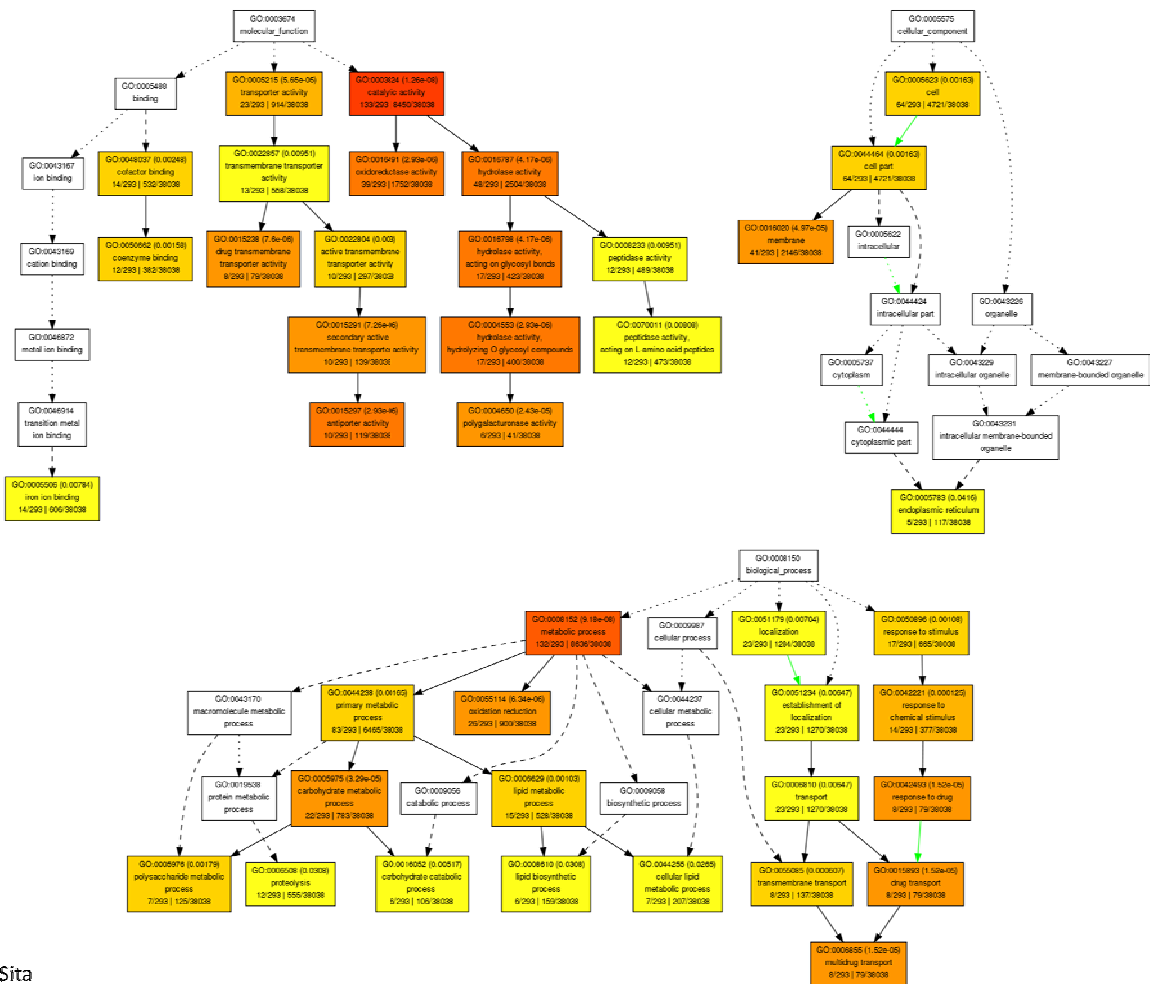

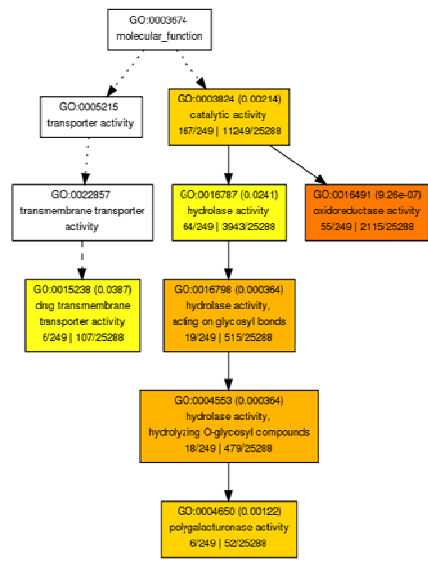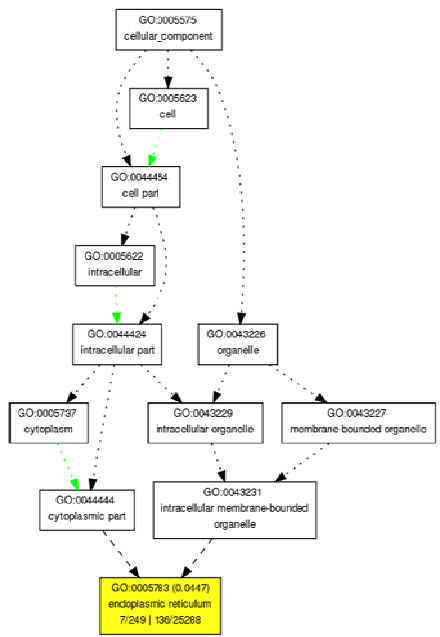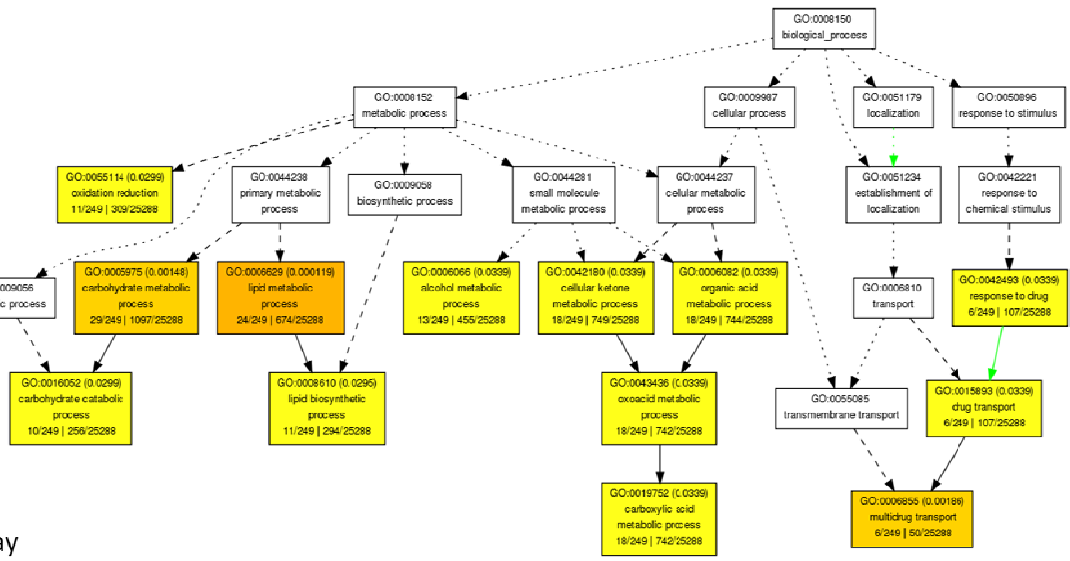

Supplement: pgen.1004843.s011.pdf [file pgen.1004843.s011.pdf]
